# Supplementary material
Source: PubMed Central journal article supplement (PMC3726149)
Supplement: JCI64060sd.pdf [file JCI64060sd.pdf]

# Supplementary Figures

## S1.

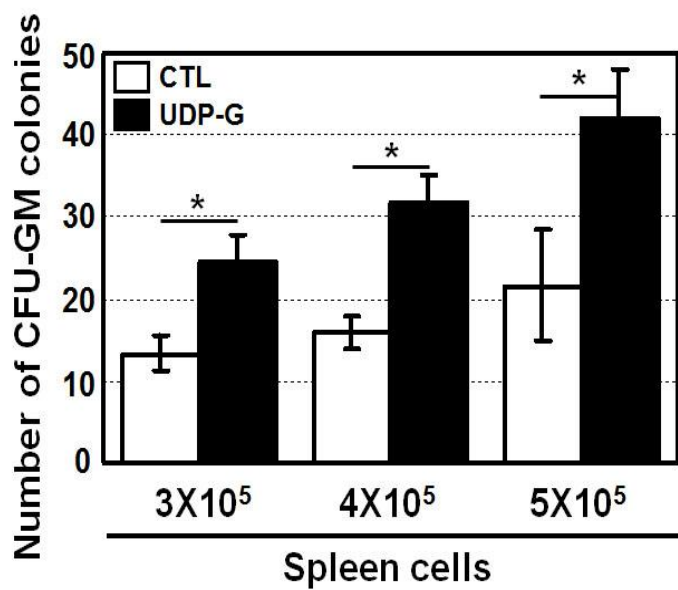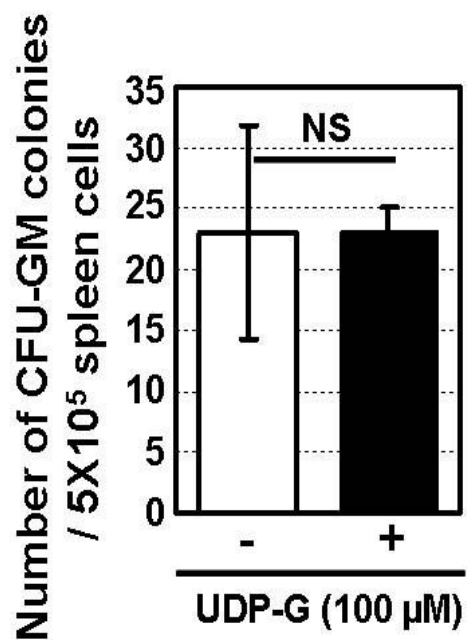

S2

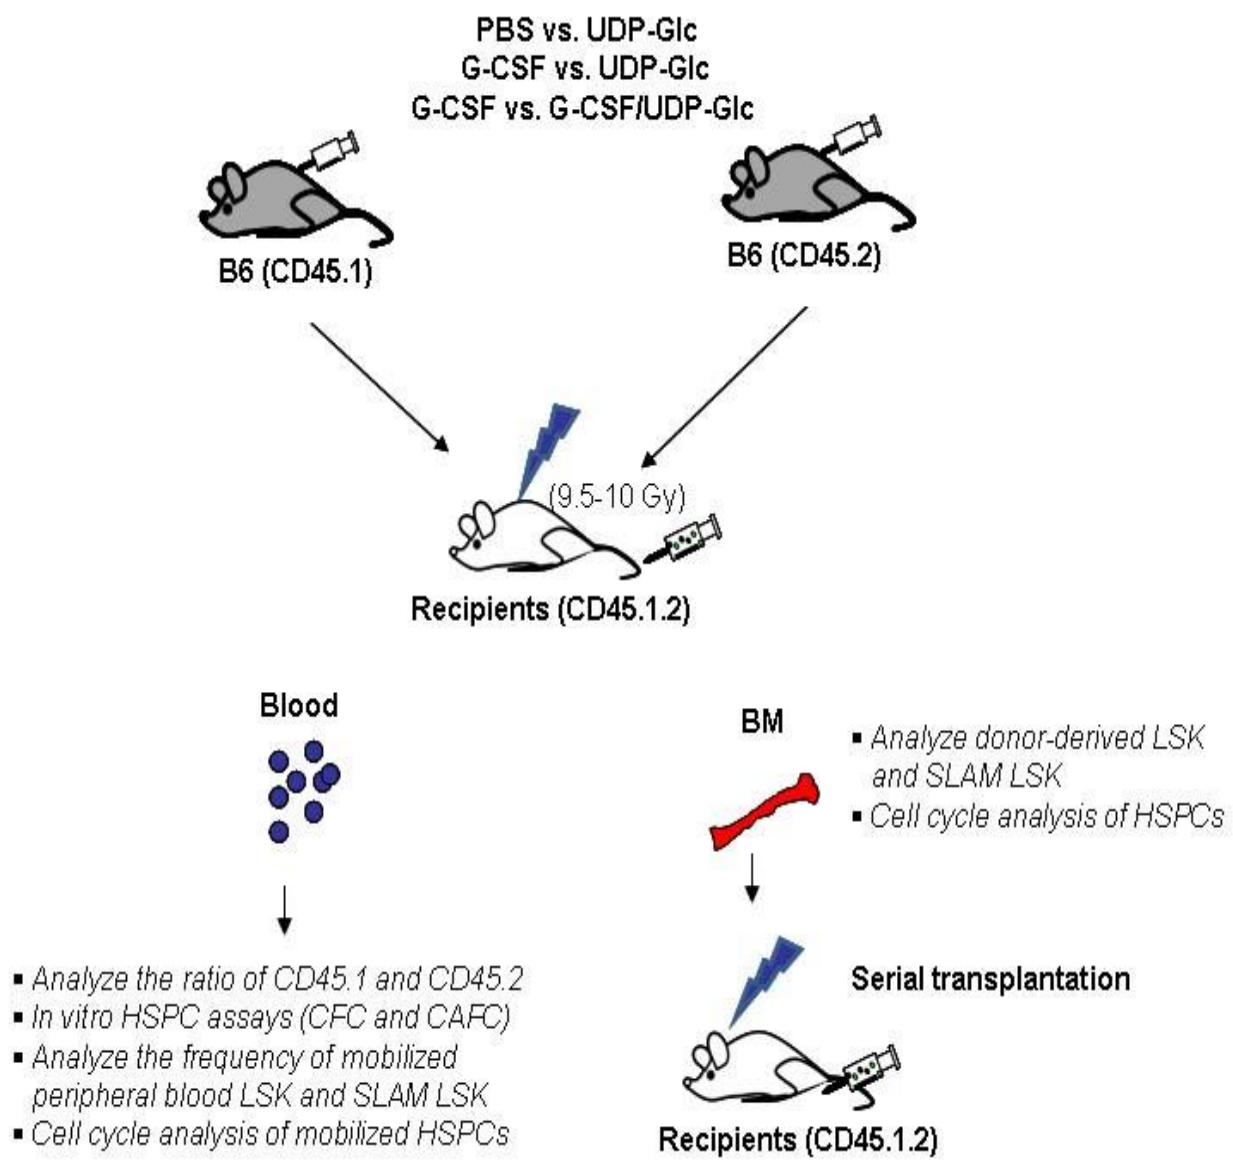

S3

UDP-G

1M after UDP-G

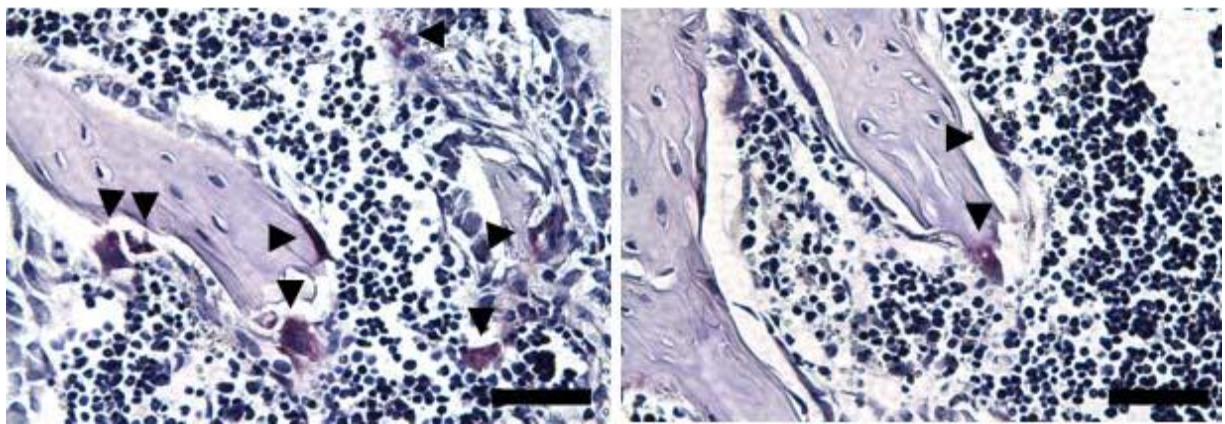

S4

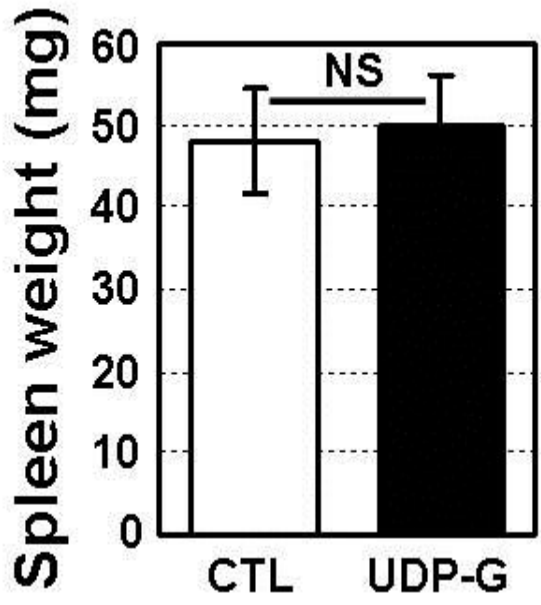

## Supplementary Figures and Legends

### Figure S1.

Left: Mice (B6) were injected s.c. once daily with UDP-Glc (200 mg/kg, 6 days). Spleen cells were harvested and assayed for colony forming cells as described in the Methods. Results are shown as mean  $\pm$  SD of three independent experiments, each with duplicate wells per treatment group.  $*p < 0.05$  Right: Spleen cells from B6 mice were harvested and assayed for colony forming cells in the absence or presence of UDP-Glc (100  $\mu$ M). Results are shown as mean  $\pm$  SD of two independent experiments, each with duplicate wells per treatment group.

### Figure S2.

Schema showing the experimental design used to compare short- and long-term repopulating ability between UDP-Glc-, G-CSF-, and G-CSF+UDP-Glc-mobilized peripheral blood cells.

### Figure S3.

Mice were injected daily for 6 days with UDP-Glc as described and then left untreated for 3-4 weeks. TRAP staining was done as described in Materials and Methods. Arrowheads indicate TRAP-positive cells. A representative TRAP staining is shown. Scale bar, 50  $\mu$ M.

### Figure S4.

Mice were injected with UDP-Glc (UDP-G, n=11) or PBS (CTL, n=3) as described in Materials and Methods. The spleens were removed and weighed. The data shown are the mean  $\pm$  SD. NS = not significant.
